# Supplementary material
Source: PubMed Central journal article supplement (PMC8209585)
Supplement: jamadermatol-e211311-s003.pdf [file jamadermatol-e211311-s003.pdf]

## Data Sharing Statement

Nakatsuji. Use of Autologous Bacteriotherapy to Treat Staphylococcus aureus in Patients With Atopic Dermatitis. *JAMA Dermatol*. Published June 16, 2021.  
doi:10.1001/jamadermatol.2021.1311

### Data

**Data available:** Yes

**Data types:** Deidentified participant data

**How to access data:** ClinicalTrials.gov (NCT03158012).

**When available:** With publication

### Supporting Documents

**Document types:** None

### Additional Information

**Who can access the data:** Researchers whose proposed use of data has been approved.

**Types of analyses:** Any purpose

**Mechanisms of data availability:** Without investigator support
